# Supplementary material for: Lysophosphatidic Acid Receptor Is a Functional Marker of Adult Hippocampal Precursor Cells
Source: PubMed Central journal article supplement — Stem Cell Reports. 2016 Mar 31;6(4):552–65. doi: 10.1016/j.stemcr.2016.03.002 (PMC4834054; doi:10.1016/j.stemcr.2016.03.002), 2016-03-31
Supplement: mmc1.pdf [file mmc1.pdf]

**Stem Cell Reports, Volume 6**

**Supplemental Information**

**Lysophosphatidic Acid Receptor Is a Functional Marker of Adult Hippocampal Precursor Cells**

**Tara L. Walker, Rupert W. Overall, Steffen Vogler, Alex M. Sykes, Susann Ruhwald, Daniela Lasse, Muhammad Ichwan, Klaus Fabel, and Gerd Kempermann**

## Supplemental Figures

### Figure S1, related to Figure 1. Coronal brain sections from an adult LPA<sub>1</sub>-GFP mouse

Panel of representative coronal cryosections from a one-in-three series cut at a thickness of 20  $\mu\text{m}$ . The endogenous GFP signal was amplified by additional staining using an anti-GFP-antibody.

### Figure S2, related to Figure 1. LPA<sub>1</sub>-GFP cells are also found in other brain regions

(a) GFP<sup>+</sup> cells are visible in the CA3 region of the hippocampus. (b) Prominent GFP signal is observed in the vasculature (green) in the hippocampal fissure, PROX-1 (red). (c) In the adult SVZ, the ventricular lining and only a few cells show a faint GFP signal. No overlap with BrdU (blue) and DCX (red) is observed. (d, d\*) GFP signal compared to GFP immunofluorescence (Cy5 colored green; d\*) in the SVZ. (e) GFP<sup>+</sup> cells in the glomeruli of the olfactory bulb co-express TBR2 (red). (f) GFP<sup>+</sup> cells in the olfactory bulb show no obvious co-localization to either DCX (f, red) or Calretinin (f, blue) but co-localize with SOX2 (g, red). The cortex (at the level of the SVZ) shows a population of GFP<sup>+</sup> cells that has no obvious co-localization with TBR2 (h, red), but an overlap with NeuN expression (h\*, red). (i) A population of bright GFP<sup>+</sup> cells is visible in the habenula (SOX2, red). Scale bars are 100  $\mu\text{m}$  in b, d and d\* and 25  $\mu\text{m}$  in f, g; all others are 50  $\mu\text{m}$ . Panels d, d\*, e, h\* and i are maximum intensity projections and panels c, f, g and h are single planes of z-stacks.

### Figure S3, related to Figure 3. Additional markers in combination with LPA<sub>1</sub>-GFP allow the proliferative precursor population to be isolated

(a) A histogram representing the number of neurospheres generated per 1000 cells from the LPA<sub>1</sub>-GFP<sup>high</sup> and LPA<sub>1</sub>-GFP<sup>low</sup> populations. Data represent the mean  $\pm$  SEM from 3 independent experiments, \*  $p = 0.05$ , Student's t-test. (b) A histogram representing the neurosphere-forming capacity of the four cell populations isolated on the basis of LPA<sub>1</sub>-GFP and EGFR expression. Data represent the mean  $\pm$  SEM from 3 independent experiments,  $F_7 = 38.2$ , \*\*  $p = 0.002$ , one-way ANOVA with Tukey's multiple comparison test. (c) A histogram representing the neurosphere-forming capacity of the three cell populations isolated on the basis of LPA<sub>1</sub>-GFP, EGFR and prominin-1 (CD133) expression. Data represent the mean  $\pm$  SEM from 3 independent experiments,  $F_7 = 26.8$ , \*\*\*  $p = 0.001$ , one-way ANOVA with Tukey's multiple comparison test.

### Figure S4, related to Figure 4. The LPA<sub>1</sub><sup>+</sup> precursor cell population does not contain any contaminating blood or endothelial cells

Primary dentate gyrus cells from LPA<sub>1</sub>-GFP mice were gated on the basis of forward and side scatter and separated into LPA<sub>1</sub>-GFP<sup>+</sup> and LPA<sub>1</sub>-GFP<sup>-</sup> populations: isotype-PE controls were used to set the background gates (a). (b) Whereas a small percentage of CD31<sup>+</sup> endothelial cells were present in the LPA<sub>1</sub>-GFP<sup>-</sup> population (3 %), no CD31-PE<sup>+</sup> cells were detected in the LPA<sub>1</sub>-GFP<sup>+</sup> population (<1 %). Compared to the APC isotype control (c) no CD45<sup>+</sup> lymphocytes could be found in the LPA<sub>1</sub>-GFP<sup>+</sup> population (<0.1 %) and only a small percentage in the LPA<sub>1</sub>-GFP<sup>-</sup> population (3 %; d).

### Figure S5, related to Figure 4. CXCL1 increases primary hippocampal and SVZ neurosphere number

Significantly more neurospheres were generated from primary dentate gyrus (a) and SVZ (b) cells in the presence of the cytokine CXCL1. In contrast, no effect on neurosphere number was observed when cells from either region were cultured in the presence of CXCL2 or CCL8 (c-f). Data represent the mean  $\pm$  SEM from 3 independent experiments, \*  $p < 0.05$ , \*\*  $p < 0.01$ , two-sided Student's t-test.

**Table S1, related to Figure 4. List of precursor cell specific genes**

Lists of genes which were expressed at levels 4-fold higher ( $\log_2$  difference greater than 2) in the LPA<sub>1</sub><sup>+</sup> populations vs. the LPA<sub>1</sub><sup>+</sup> population “precursor cell specific”

**Table S2, related to Figure 4. List of proliferative cell specific genes**

Lists of genes which were expressed at levels 4-fold higher ( $\log_2$  difference greater than 2) in the LPA<sub>1</sub><sup>+</sup>EGFR<sup>+</sup>prominin-1<sup>+</sup> population vs. the other two populations “Proliferative cell specific”.

**Table S3, related to Figure 4. Gene Ontology enrichment analysis of the precursor cell populations**

Results of a Gene Ontology enrichment analysis of the 255 precursor cell specific genes (“LPA1-positive cell specific” from Table S1). The *p*-values are given for a Fisher test as well as after Benjamini-Hochberg correction (“adjP”). Only results that were significant (adjP < 0.05) after correction are shown.

**Table S4, related to Figure 4. Gene Ontology enrichment analysis of the proliferative cell population**

Results of a Gene Ontology enrichment analysis of the 145 precursor cell specific genes (“Proliferative cell specific” from Table S1). The *p*-values are given for a Fisher test as well as after Benjamini-Hochberg correction (“adjP”). Only results that were significant (adjP < 0.05) after correction are shown.

**List of primary antibodies**

| <b>Antibody</b> | <b>Species</b> | <b>Dilution</b> | <b>Company</b> | <b>Catalog number</b> |
|-----------------|----------------|-----------------|----------------|-----------------------|
| βIII-tubulin    | mouse          | 1:2000          | Promega        | G712A                 |
| BrdU            | rat            | 1:500           | AdD Serotec    | OBT0030               |
| BrdU            | mouse          | 1:500           | BD Bioscience  | 347580                |
| Calretinin      | mouse          | 1:250           | Swant          | 6B3                   |
| DCX             | goat           | 1:250           | Santa Cruz     | sc-8066               |
| FOX3            | rabbit         | 1:500           | Abcam          | ab104225              |
| GFAP            | mouse          | 1:1000          | Sigma          | 63893                 |
| GFAP            | rabbit         | 1:500           | DakoCytomation | z0334                 |
| GFP             | rabbit         | 1:400           | Invitrogen     | A11122                |
| MAP2ab          | mouse          | 1:200           | Sigma          | M1406                 |
| Nestin          | mouse          | 1:200           | BD Biosciences | 611658                |
| NeuN            | mouse          | 1:100           | Chemicon       | MAB377                |
| NeuroD          | goat           | 1:250           | Santa Cruz     | sc-1086               |
| O4              | mouse          | 1:100           | R&D Systems    | MAB1326               |
| Prominin-1-PE   | mouse          | 1:200           | eBioscience    | 12-1331               |
| SOX2            | goat           | 1:400           | Santa Cruz     | sc-17320              |
| s100β           | rabbit         | 1:800           | Abcam          | ab52642               |
| TBR2            | rabbit         | 1:800           | Abcam          | ab23345               |
| Vimentin        | chicken        | 1:2000          | Millipore      | AB5733                |

## Supplemental Experimental Procedures

### Animals

Frozen sperm of LPA<sub>1</sub>-GFP mice (FVB/N-Swiss Webster background) were obtained from the GENSAT organization (Gong et al., 2003) and transferred to C57BL/6 female mice by laser-assisted *in vitro* fertilization resulting in LPA<sub>1</sub>-GFP mice with a mixed FVB/N-Swiss Webster-C57BL/6 background. Only male animals were positive for GFP and were crossed to wild-type littermates. Nestin-GFP mice (Yamaguchi et al., 2000) were generated by Masuhiro Yamaguchi (University of Tokyo, Japan). Nestin-Cyan nuclear mice (Encinas and Enikolopov, 2008) were provided by Grigori Enikolopov (Cold Spring Harbor Laboratories, NY, USA). All experiments were conducted in accordance with the applicable European and National regulations (Tierschutzgesetz) and approved by the responsible authority (Landesdirektion Sachsen). Animals were maintained on a 12 h light/dark cycle with food and water provided *ad libitum*. All animals were 8 weeks old at the time of the experiment and the cohorts consisted of a mixture of male and females. For detection of proliferation in running LPA<sub>1</sub>-GFP mice, animals were housed in pairs for 10 d in cages in the presence or absence of running wheels (TSE, Germany).

### Brain tissue preparation

LPA<sub>1</sub>-GFP mice (8 weeks) were perfused transcardially with 0.9 % NaCl followed by 4 % paraformaldehyde (PFA). The brains were then removed and postfixed in 4 % PFA overnight. After postfixation, the brains were cryoprotected by incubation overnight in 30 % w/v sucrose in phosphate buffered saline (PBS) until they sank. Frozen coronal serial sections (40 µm) were cut using a dry-ice cooled copper stage at a Leica table-top sliding microtome and stored at 4 °C in cryoprotectant solution (25 % ethyleneglycol, 25 % glycerol in 0.1 M phosphate buffer pH 7.4). Another set of brains was specifically processed for whole section imaging. These brains were cut to 20 µm thickness using a CryoStar NX70 Cryostat (Thermo Scientific) and kept at 4 °C until further processing.

### BrdU and GFP immunohistochemistry (DAB)

For quantification of BrdU<sup>+</sup> and GFP<sup>+</sup> cells in the dentate gyrus, sections were treated with 0.6 % H<sub>2</sub>O<sub>2</sub> in order to block endogenous peroxidase activity, washed and incubated in pre-warmed 2 N HCl (37 °C) washed in tris buffered saline (TBS), blocked in a solution containing 10 % normal donkey serum (NDS; Sigma-Aldrich) in 0.1 M TBS containing 0.2 % Triton-X-100 and incubated with BrdU (1:500; BD Bioscience) or GFP antibody (1:400; Invitrogen) in TBS containing 3 % NDS with 0.2 % Triton X-100 overnight at 4 °C. The sections were then washed and incubated for 4 h with anti-rat-biotin secondary antibody (Dianova), washed again and incubated in Vectastain ABC-Elite reagent (9 µg/ml, Vector Laboratories, LINARIS Germany) for 1 h, washed and 0.075 mg/ml diaminobenzidine (DAB; Sigma, Germany) with 0.04 % NiCl applied as the chromogen. Every sixth section (240 µm apart) was counted in the complete ventral dorsal extent of the dentate gyrus by brightfield microscopy at 40x magnification using a Leica DM 750 microscope. Results were multiplied by 6 in order estimate the total number of cells per dentate gyrus.

### CldU, IdU and NeuN fluorescence immunohistochemistry

Sections were first washed with PBS and treated with 0.9 % NaCl, before DNA denaturation was performed in 2 N HCl for 30 min at 37 °C. The sections were then thoroughly washed with PBS and blocked for 1 h in PBS supplemented with 10 % donkey serum (Jackson ImmunoResearch Laboratories Inc) and 0.1 % Triton X-100. Primary antibodies (rat anti-BrdU, mouse anti-BrdU and rabbit-anti-FOX3) were diluted in PBS supplemented with 3 % donkey serum and 0.1 % Triton X-100. Incubation was performed overnight at 4 °C. After several rinses in PBS, the sections were incubated with secondary antibodies (anti-rat Alexa Fluor 488, anti-mouse Cy3 and anti-rabbit Alexa Fluor 647)

diluted in PBS supplemented with 3 % donkey serum and 0.1 % Triton X-100 at room temperature for 4 h. They were then washed in PBS, after which 4',6-diamidino-2-phenylindole (DAPI) staining was performed for 10 min using DAPI diluted 1:2000 in PBS. After a final wash with PBS, the sections were mounted on glass slides and coverslipped with Aqua-Poly/Mount (Polysciences Europe GmbH). Every sixth section (240  $\mu$ m apart) was counted in the complete ventral dorsal extent of the dentate gyrus, at 40x magnification using a Zeiss Apotome microscope. Results were multiplied by 6 in order to obtain the total number of positive cells within the dentate gyrus region of each brain.

### **Standard fluorescence immunohistochemistry**

For all other fluorescence immunohistochemistry, sections were first incubated for 60 min at room temperature in 0.1 M PBS containing 10 % normal donkey serum (NDS; Sigma-Aldrich) and 0.2 % Triton X-100. The blocking solution was replaced with fresh solution containing 3 % NDS, 0.2 % Triton X-100 and primary antibodies. Following incubation for 36 h at 4 °C the sections were washed with PBS and incubated for 4 h at room temperature in blocking solution containing the appropriate DyLight secondary antibodies (1:500; Dianova). After washing with PBS, the sections were mounted onto slides and coverslipped with 2.5 % PVA-DABCO.

### **Whole slide imaging**

A one-in-three series of coronal cryosections were acquired using a wide-field microscope specifically equipped for fast and automated image acquisition (Zeiss AxioObserver with AxioCam MRm and ZEN blue 2012 software). Preview images of every slide were acquired in phase-contrast using a 2.5x objective. Individual sections were marked, the tile-region adjusted and the sections imaged using a 10x objective. Subsequently, image brightness and contrast were adjusted for display.

### **Analyses of LPA<sub>1</sub>-GFP<sup>+</sup> phenotypes**

Images were captured with a laser scanning microscope (Zeiss LSM 780) using a 20x objective (Plan-APOChromat NA 0,8) and 10x objective (Plan-APOChromat NA 0,45 for Figure 2B) using the sequential scanning mode and checking each fluorophore for bleach-through to neighboring channels. Linear unmixing was performed using Zeiss software (ZEN black 2012), using tissue sections of Nestin-Cyan nuclear and LPA<sub>1</sub>-GFP mice to generate the emission spectra of the single fluorophores.

Maximum intensity projections were also performed using the ZEN black software. Images were processed with ImageJ (Version 1.47) and Photoshop CS5, and, if necessary, only general brightness/contrast enhancements of the entire image were applied with no further manipulations. Some image sizes were adapted using bicubic interpolation to fit into the figures and in order to adjust the panels to the requested format.

For quantification of LPA<sub>1</sub>-GFP co-localization with other makers, 800 GFP<sup>+</sup> cells over 4 animals for each antibody combination were imaged and phenotyped.

### **Fluorescence activated cell sorting and *in vitro* cell culture**

Nestin-GFP or LPA<sub>1</sub>-GFP mice (8 weeks old; 8 per experiment) were killed, their brains immediately removed, and the dentate gyrus microdissected (Hagihara et al., 2009). The tissue was enzymatically digested using a Neural Tissue Dissociation Kit (Miltenyi) according to the manufacturer's instructions. Following a final wash in Hank's balanced salt solution (HBSS) (PAA; GE Healthcare) the pellet was resuspended in 1 ml of HBSS and filtered through a 40  $\mu$ m cell sieve (Falcon; BD Biosciences). Cells were stained with a prominin-1 specific antibody (1:200, 13A4-phycoerythrin (PE); eBioscience) and/or EGF-647 (1:100, Molecular Probes) for 30 min at 4 °C. Prior to adding the prominin-1-PE or EGF-647, a small proportion of the cells were removed and stained with an isotype control (rat IgG1-PE; eBioscience) as a control for non-specific staining. The cells

were finally washed in 10 ml HBSS before being resuspended in 1 ml of HBSS. They were then analyzed using a FACS Aria III cell sorter (BD Biosciences). Dead cells were excluded by staining with propidium iodide (1  $\mu\text{g/ml}$ ). The WT live fraction consisted of all cells collected from a wild-type animal following exclusion of the dead cells using the dye propidium iodide. Sorted populations of cells were collected directly into neurosphere growth medium and each population was plated into 48 wells of a 96-well plate as described elsewhere (Walker and Kempermann, 2014). Approximately 16 h after sorting the cells were counted in at least 6 wells, and the average cell number per well was determined.

### **FACS analysis of DG niche composition**

To determine the cellular composition of the dentate gyrus, cells were isolated from LPA<sub>1</sub>-GFP mice as described above. Using flow cytometry we analyzed the percentage of cells that were neurons (NeuN<sup>+</sup>), astrocytes (GFAP<sup>+</sup>), microglia (CD11b<sup>+</sup>), neuroblasts (PSA-NCAM<sup>+</sup>) and precursor cells (LPA<sub>1</sub>-GFP<sup>+</sup>). For the intracellular markers (NeuN and GFAP) the cells were first fixed with 0.4 % PFA for 15 mins at room temperature. Following a wash with PBS, the cells were resuspended in PBS containing 1 % BSA and 0.1 % saponin and the primary antibody (NeuN 1:100 or GFAP 1:500) added and incubated for 30 mins at 4 °C. Following another PBS wash the cells were resuspended in buffer containing secondary antibody (1:500; anti-mouse Cy5 or anti-rabbit Alexa Flour647) for 20 mins at 4 °C in the dark. The cells were then washed with PBS and resuspended in 500  $\mu\text{l}$  PBS and filtered through a 40  $\mu\text{m}$  sieve before being analysed using a ArialIII flow cytometer (BD Biosciences). For the surface antibodies the cells were stained in PBS containing (1:200; CD11b-PE or PSA-NCAM-PE) for 30 mins at 4 °C in the dark, washed with PBS, resuspended in PBS and filtered through a 40  $\mu\text{m}$  sieve. The appropriate secondary only or isotype controls were used to set the background gates for analysis.

### **LPA and cytokine neurosphere cultures**

For the *in vitro* neurosphere experiments, primary dentate gyrus cells were isolated as described above and plated at a density of one dentate gyrus per 96 well plate. This is considered to be a clonal density as it gives rise to an average of approximately one neurosphere per well. Immediately prior to plating, the appropriate compounds were added to the cell suspensions: LPA (18:1 1-oleoyl-2-hydroxy-sn-glycero-3-phosphate, 10  $\mu\text{M}$ ; Avanti Polar Lipids) the LPA<sub>1</sub> antagonist DGPP (8:0 dioctanoylglycerol pyrophosphate, 50  $\mu\text{M}$ ; Avanti Polar Lipids), KCl (15 mM), CXCL1 (3 ng/ml or 30 ng/ml; R & D Systems), CXCL2 (0.1 ng/ml, 1 ng/ml, or 10 ng/ml; R & D Systems) or CCL8 (10 ng/mL or 100 ng/ml; BioLegend). Following 10 days in culture (37 °C / 5% CO<sub>2</sub>) neurospheres were counted and their diameter measured using an inverted light microscope fitted with an ocular graticule.

### **Neurosphere passaging and differentiation**

Primary hippocampal neurospheres were passaged by removing 150  $\mu\text{l}$  of the medium from wells containing single large neurospheres, and treating with 100  $\mu\text{l}$  of 0.05 % trypsin-EDTA (Gibco) for 3 min at room temperature, followed by washing with 100  $\mu\text{l}$  of trypsin inhibitor (0.125 mg/ml trypsin inhibitor plus 0.01 mg/ml DNaseI) in DMEM. The neurospheres were mechanically triturated until dissociated, then replated in 24-well plates in 2 ml of complete medium. Neurospheres were passaged every 10 d by removing the medium containing the neurospheres from the plates and centrifuging at 100 rcf for 7 min. The supernatant was then decanted, and the neurospheres were incubated in 1 ml of 0.05 % trypsin-EDTA for 3 min at room temperature. After the addition of an equal volume of trypsin inhibitor, the neurospheres were centrifuged at 100 rcf for 7 min and the supernatant was removed. Cells were mechanically triturated in 500  $\mu\text{l}$  of complete medium, and trypan blue staining was used to evaluate the number of cells, both viable and the total number, on a hemocytometer. The passaged cells were then replated with complete medium at a density of  $1 \times 10^4$  cells/cm<sup>2</sup> in tissue culture flasks (Nalge Nunc International) or tissue culture plates (Falcon; BD

Biosciences) as appropriate. For differentiation, neurospheres were plated onto PDL and laminin-coated coverslips in DMEM/F-12 Basal Medium containing mouse NeuroCult NSC Proliferation Supplements without growth factors. The neurospheres were allowed to differentiate for 8 d in humidified 5 % CO<sub>2</sub> until flattened and adherent. The differentiated neurospheres were then fixed with 4 % PFA in 0.1 M PBS at room temperature for 30 min. After washing with PBS, they were stained for either the neuronal markers  $\beta$ III-tubulin or Map2ab, the astrocytic marker glial fibrillary acidic protein (GFAP), the oligodendrocyte marker O4 or the precursor cell antigen Nestin, with a DAPI counterstain to visualize the nuclei.

### **Adherent precursor cell line initiation and passaging**

The primary cells from each sorted population were plated into one well of a 24-well plate (Falcon; BD Biosciences) that had been coated with PDL (10 mg/ml) and laminin (10 mg/ml) in 2 ml of growth medium. The growth medium consisted of Neurobasal medium (Gibco, Life Technologies), supplemented with 2 % B27 (Invitrogen), 1X GlutaMAX (Life Technologies) and 50 units/ml penicillin/streptomycin (Life Technologies). The following growth factors were also included: 20 ng/ml EGF and 20 ng/ml FGF-2. The growth medium was changed every 2-3 d and the cells were passaged when they reached approximately 80 % confluency.

### **Immunostaining of neurospheres and adherent cultures**

The differentiated neurospheres or adherent cultures were fixed with 4 % PFA (Sigma-Aldrich) in 0.1 M PBS at room temperature for 20 min. After washing with PBS, the cells were incubated in blocking solution (10 % normal donkey serum in 0.1 M PBS containing 0.2 % Triton X-100) for 60 min at room temperature. The cells were then incubated in fresh blocking solution containing mouse monoclonal  $\beta$ III-tubulin antibody plus rabbit GFAP antibody for 60 min at room temperature. The cells were washed three times with PBS and incubated in fresh blocking solution containing donkey anti-mouse Cy3 antibody (1:1000; Jackson ImmunoResearch), DyLight 488 donkey anti-rabbit antibody (1:1000; Dianova) and DAPI (1:5000; Sigma-Aldrich) for 30 min at room temperature. Following another three PBS washes, the slides were mounted using fluorescence mounting medium (DakoCytomation) before being viewed at 20x magnification on a Zeiss Apotome microscope.

### **Next generation sequencing**

Three populations of primary DG cells; "proliferative precursor cells" (LPA<sub>1</sub>-GFP<sup>+</sup>EGFR<sup>+</sup>Prominin1<sup>+</sup>), "non-proliferative precursor cells" (LPA<sub>1</sub>-GFP<sup>+</sup>EGFR<sup>+</sup>prominin-1<sup>-</sup>, LPA<sub>1</sub>-GFP<sup>+</sup>EGF<sup>+</sup>prominin-1<sup>+</sup> and LPA<sub>1</sub>-GFP<sup>+</sup>EGFR<sup>+</sup>prominin-1<sup>-</sup>) and "niche cells" (LPA<sub>1</sub>-GFP<sup>-</sup>) were isolated by FACS and pools of approximately 1000 cells were used for RNA extraction using the RNeasy micro kit (Qiagen). After elution in 10  $\mu$ l of RNase free water, 5  $\mu$ l was used for cDNA synthesis using SmartScribe reverse transcriptase (Clontec), a universally tailed poly-dT primer and a template switching oligonucleotide. This was followed by 12 cycles of amplification of the purified cDNA with the Advantage 2 DNA Polymerase. After ultrasonic shearing of the amplified cDNA (Covaris S2) samples were subjected to standard Illumina fragment library preparation using the NEBnext chemistries (New England Biolabs). The libraries were subsequently finalized by a universally primed PCR amplification of 15 cycles. Libraries were purified using XP beads (Beckman Coulter), quantified by qPCR (KAPA Biosystems) and subjected to Illumina 75 bp single end sequencing on the Illumina HiSeq 2000 platform providing on average 35 Mio reads per sample. Reads were mapped to the latest mouse genome build (mm10) using the STAR algorithm (Dobin et al., 2013). A novel algorithm, FPKEM (<https://pypi.python.org/pypi/fpkem>), was used to obtain counts of fragments per kilobase of expressed exonic sequence per million reads. Raw fpkem data were shifted by the addition of a constant (= 1) and then log<sub>2</sub>-transformed.

### **Transcriptome analysis**

All analyses were performed in R (<http://www.R-project.org/>). An ANOVA filter (Benjamini-



Hochberg adjusted  $p < 0.05$ ) was used to select transcripts that were significantly different between the populations. Stem and precursor cell-specific transcripts were then defined by a 4-fold ( $\log_2$  difference of 2) increase in expression between the groups; i.e. either higher in stem cells vs. niche cells and higher in progenitor cells vs. niche cells (precursor cell-specific) or higher in stem cells vs. niche cells and higher in stem cells vs. progenitor cells (stem cell-specific). Gene Ontology enrichment (Ashburner et al., 2000) was carried out using the topGO package (Alexa & Rahnenführer, 2010) and visualized with the help of REViGO (<http://revigo.irb.hr/>; (Supek et al., 2011)). REViGO was carried out with a semantic similarity threshold of 0.7 using the method of Lin (1998). KEGG enrichment (Kanehisa and Goto, 2000) was done with the clusterProfiler package (Yu et al., 2012). The STRING network graph was exported from the STRING web interface (<http://string-db.org/>) and visualized using Cytoscape (<http://www.cytoscape.org/>).

Principal component analysis was performed using the package *prcomp*. Figure 5A was reconstructed using data and code from a published single cell sequencing study (Shin et al., 2015). Briefly, data for all genes in individual cells were subjected to principal component decomposition and PC1 and PC2 were plotted. Five cell subtypes (S1–S5) were identified by clustering and colored differently on the plot (see original paper and accompanying Supplemental Data for details; Shin *et al.*, 2015). To compare our data with that study, we first retrieved expression data from the Shin *et al.* dataset which matched our lists of genes enriched in the proliferative and non-proliferative LPAR<sup>+</sup> populations (Table S1; matched by gene symbol, as different IDs were used in the two studies). A principal component analysis was then performed using each of these two new data subsets and an eigengene was calculated from the first principal component with the sign adjusted to positively correlate with the mean gene expression for each cell and scaled so that the minimum value was equal to 0. This eigengene was plotted as a bar graph in which data were pooled for all the cells in each of the defined subtypes (S1–S5), and the expression level of the eigengene (red high; yellow low) was used to color the PCA plot from figure 5A to show how gene expression in the two LPAR<sup>+</sup> cell types corresponded to the scheme of cell subtypes described in the Shin *et al.* study.

### **LPA signaling, protein preparation and western blot analysis**

Adherent precursor cultures (passage 5) derived from the LPA<sub>1</sub>-GFP<sup>+</sup> population were grown to approximately 80 % confluency in 6 well plates then transferred to mitogen-free medium for 24 h. LPA (25  $\mu$ M) was added, and the cells were incubated for 2, 5, 10, 30 or 60 min at 37 °C. For the *ex vivo* experiments primary dentate gyrus cells were isolated and treated with either PBS or LPA (25  $\mu$ M) for 10 mins. Following the appropriate LPA stimulation, cells were washed once in ice cold PBS and lysed immediately on ice in 150  $\mu$ l lysis buffer (10 mM Tris, 150 mM NaCl, 5 mM EDTA, 1 % NP40, 0.1 % SDS, 1  $\times$  complete protease inhibitors (Roche), 1 % phosphatase inhibitor cocktail 3 (Sigma) pH 7.5 for 20 min and clarified by centrifugation at 16,000  $\times$  g for 10 min at 4 °C. Lysates were separated on 4-12 % NuPage gels and transferred to polyvinylidene fluoride membranes. The following antibodies were used rabbit anti-AKT (1:2000; Cell Signaling), rabbit anti-phospho AKT-S473 (1:2000; Cell Signaling) or mouse anti-phospho Erk1/2 (1:2000; Cell Signaling). Immunoreactive bands were detected using either donkey anti-rabbit HRP or goat anti-mouse (1:50000; Jackson ImmunoResearch Laboratories) secondary antibodies and the SuperSignal West Dura Chemiluminescent Substrate (Thermo Scientific) followed by exposure to Hyperfilm (GE Healthcare).

### **Data analysis**

Data analysis (with the exception of the next generation sequencing analysis) was performed using Prism software (Version 4.0c, GraphPad Software, Inc). Results were expressed as mean  $\pm$  standard error of the mean (SEM). Statistical significance was determined using one-way ANOVA with a Tukey's *post hoc* test or student's t-tests as appropriate. The level of conventional statistical significance was set at  $p < 0.05$ .

### Supplemental References

- Alexa, A. and Rahnenfuhrer, R. (2010). topGO: topGO: Enrichment analysis for Gene Ontology. R package version 2.16.0.
- Ashburner, M., Ball, C.A., Blake, J.A., Botstein, D., Butler, H., Cherry, J.M., Davis, A.P., Dolinski, K., Dwight, S.S., Eppig, J.T., *et al.* (2000). Gene ontology: tool for the unification of biology. The Gene Ontology Consortium. *Nat Genet* 25, 25-29.
- Dobin, A., Davis, C.A., Schlesinger, F., Drenkow, J., Zaleski, C., Jha, S., Batut, P., Chaisson, M., and Gingeras, T.R. (2013). STAR: ultrafast universal RNA-seq aligner. *Bioinformatics* 29, 15-21.
- Encinas, J.M., and Enikolopov, G. (2008). Identifying and quantitating neural stem and progenitor cells in the adult brain. *Methods Cell Biol* 85, 243-272.
- Gong, S., Zheng, C., Doughty, M.L., Losos, K., Didkovsky, N., Schambra, U.B., Nowak, N.J., Joyner, A., Leblanc, G., Hatten, M.E., *et al.* (2003). A gene expression atlas of the central nervous system based on bacterial artificial chromosomes. *Nature* 425, 917-925.
- Hagihara, H., Toyama, K., Yamasaki, N., and Miyakawa, T. (2009). Dissection of hippocampal dentate gyrus from adult mouse. *J Vis Exp*.
- Kanehisa, M., and Goto, S. (2000). KEGG: kyoto encyclopedia of genes and genomes. *Nucleic Acids Res* 28, 27-30.
- Shin, J., Berg, D.A., Zhu, Y., Shin, J.Y., Song, J., Bonaguidi, M.A., Enikolopov, G., Nauen, D.W., Christian, K.M., Ming, G.L., *et al.* (2015). Single-Cell RNA-Seq with Waterfall Reveals Molecular Cascades underlying Adult Neurogenesis. *Cell Stem Cell* 17, 360-372.
- Supek, F., Bosnjak, M., Skunca, N., and Smuc, T. (2011). REVIGO summarizes and visualizes long lists of gene ontology terms. *PLoS One* 6, e21800.
- Walker, T.L., and Kempermann, G. (2014). One mouse, two cultures: isolation and culture of adult neural stem cells from the two neurogenic zones of individual mice. *J Vis Exp*.
- Yamaguchi, M., Saito, H., Suzuki, M., and Mori, K. (2000). Visualization of neurogenesis in the central nervous system using nestin promoter-GFP transgenic mice. *Neuroreport* 11, 1991-1996.
- Yu, G., Wang, L.G., Han, Y., and He, Q.Y. (2012). clusterProfiler: an R package for comparing biological themes among gene clusters. *OMICS* 16, 284-287.

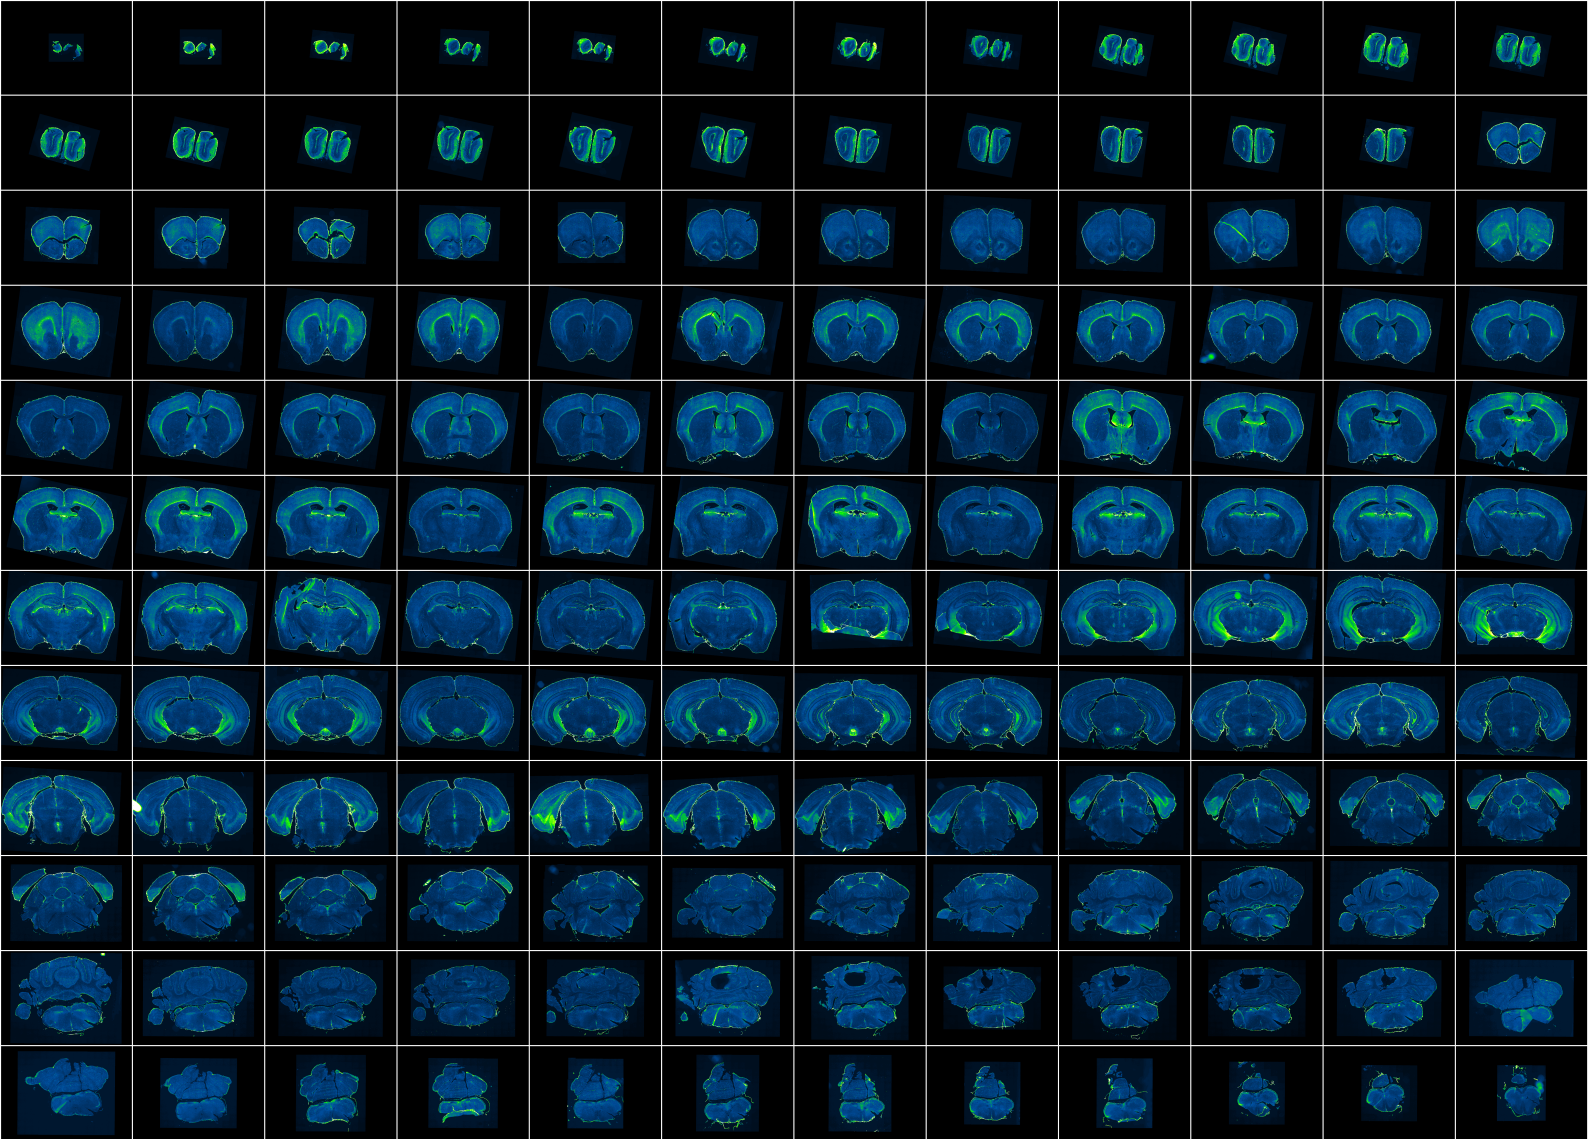

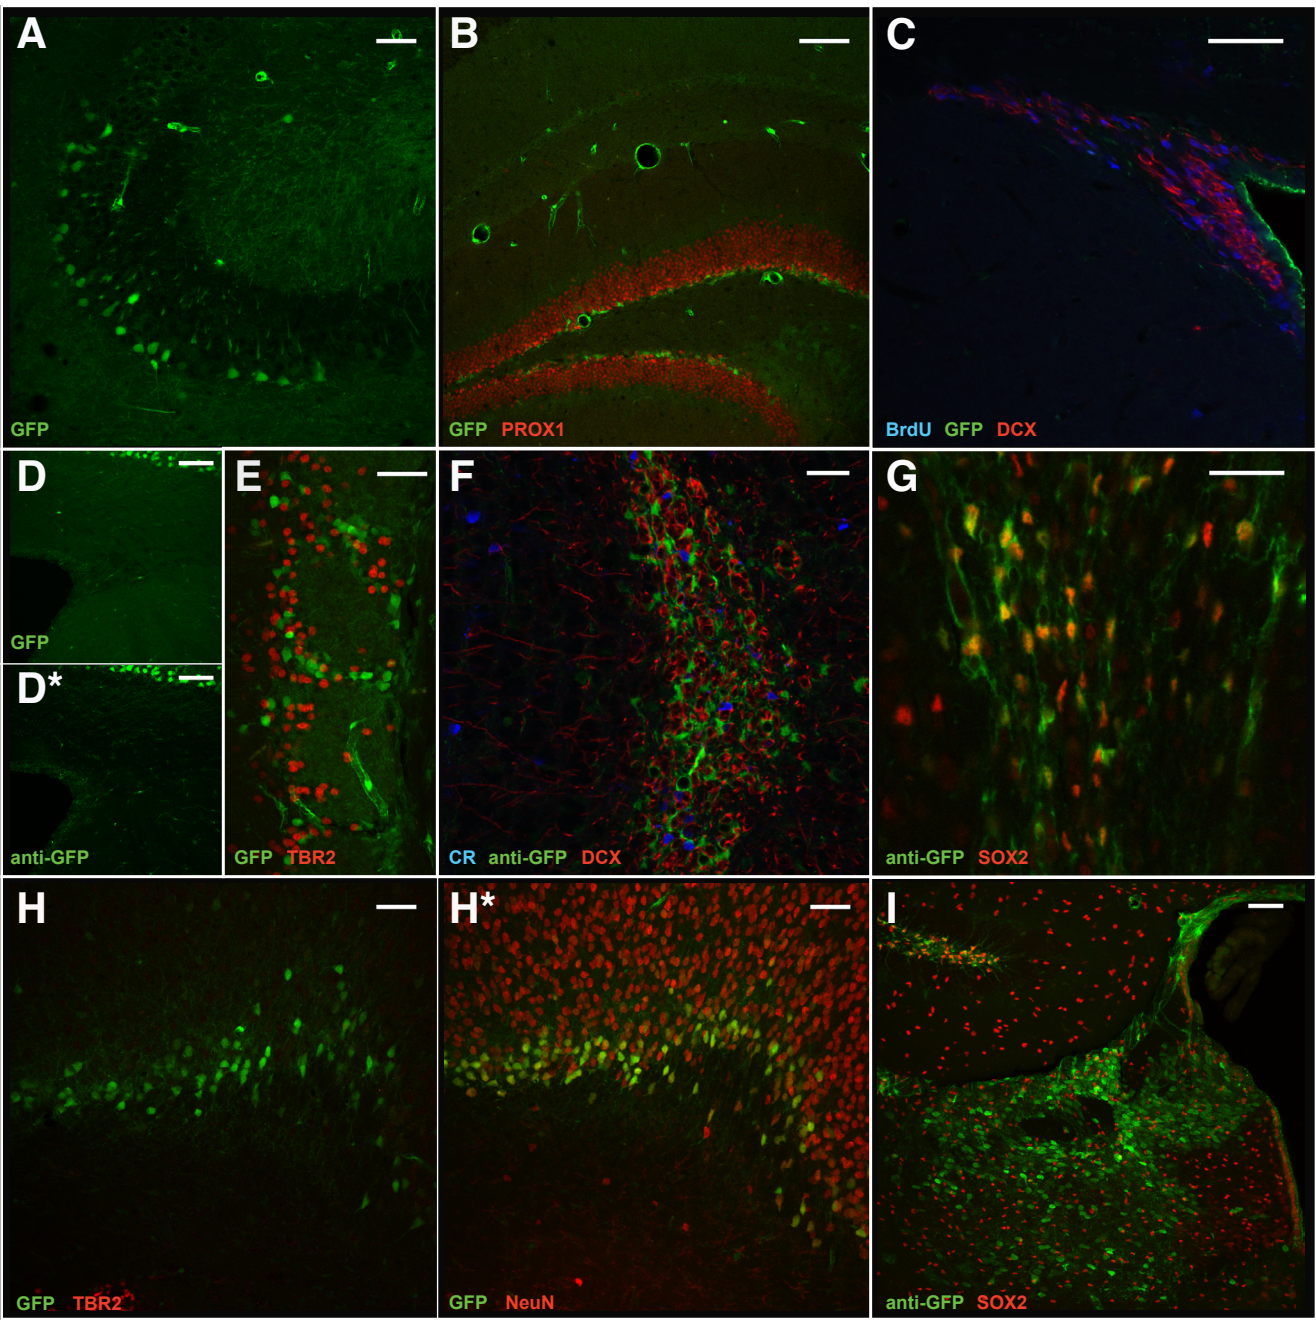

**A**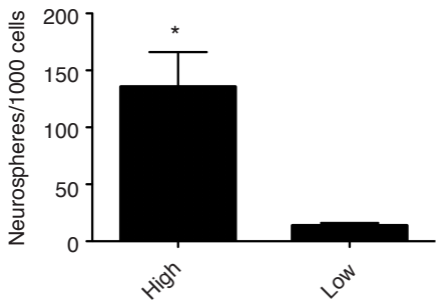**B**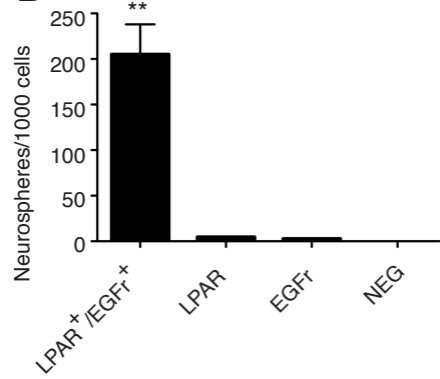**C**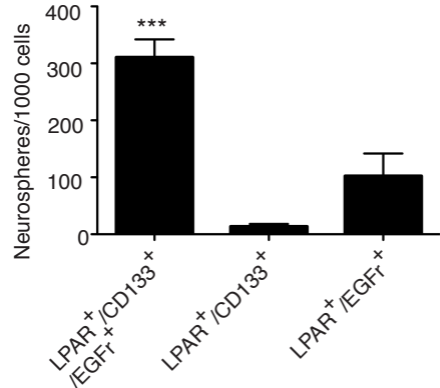**Figure S3**

## A PE isotype control

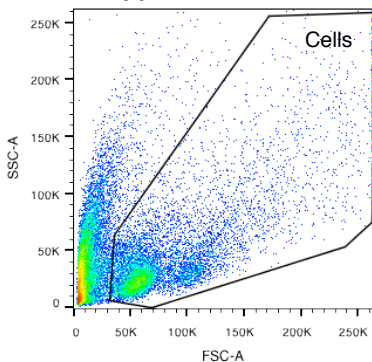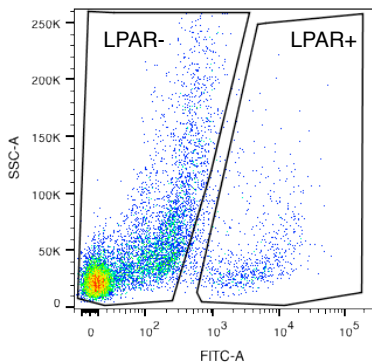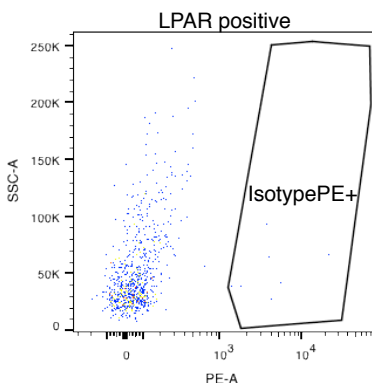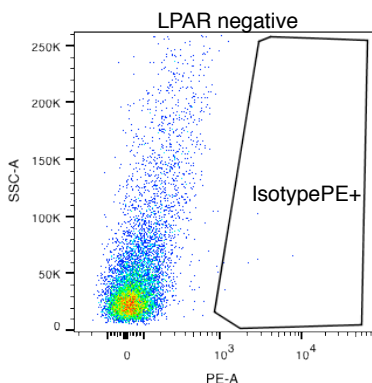

## B Endothelial Cells (CD31)

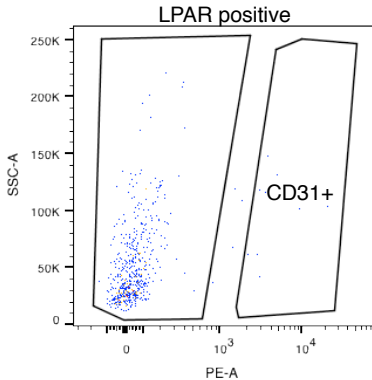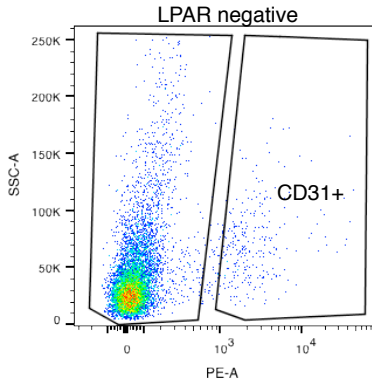

## C APC isotype control

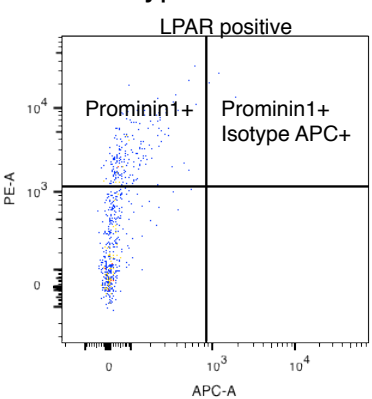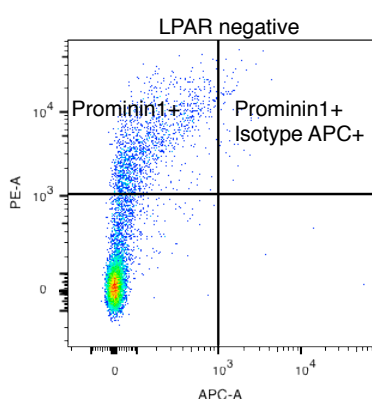

## D Lymphocytes (CD45)

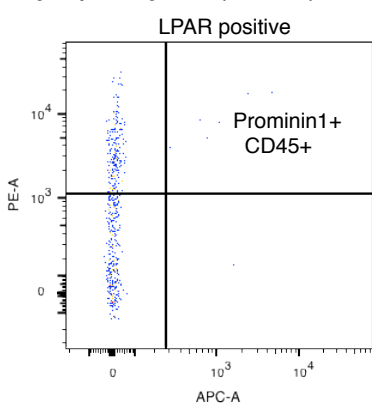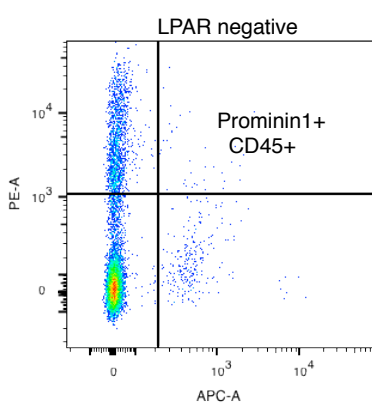

Figure S4

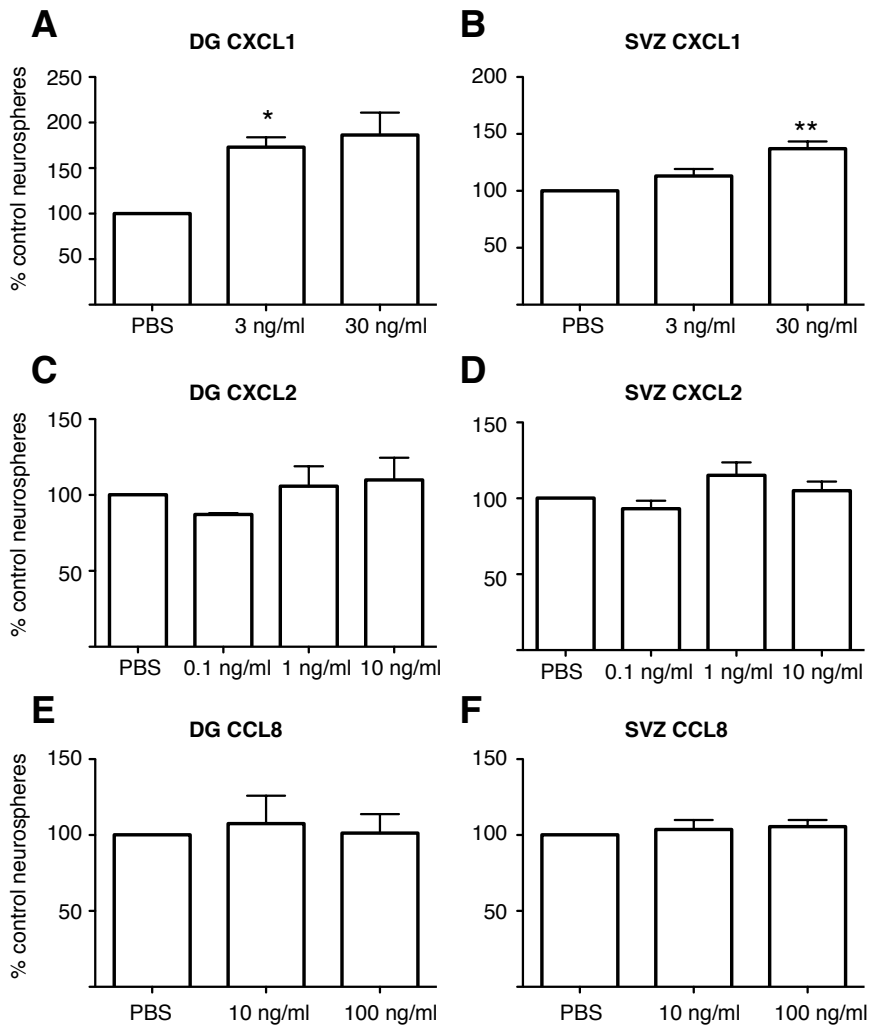

Figure S5

Supplemental Table 3.  
Gene Ontology enrichment for precursor cells.

| GO.ID      | Term                                             | Annotated | Significant | Expected | Fisher                 | adjP                   |
|------------|--------------------------------------------------|-----------|-------------|----------|------------------------|------------------------|
| GO:0007067 | mitosis                                          | 171       | 32          | 4.74     | $2.80 \times 10^{-18}$ | $3.90 \times 10^{-15}$ |
| GO:0051301 | cell division                                    | 311       | 42          | 8.63     | $3.00 \times 10^{-18}$ | $3.90 \times 10^{-15}$ |
| GO:0000280 | nuclear division                                 | 227       | 36          | 6.3      | $5.10 \times 10^{-18}$ | $3.90 \times 10^{-15}$ |
| GO:0048285 | organelle fission                                | 241       | 37          | 6.69     | $5.10 \times 10^{-18}$ | $3.90 \times 10^{-15}$ |
| GO:0007049 | cell cycle                                       | 582       | 57          | 16.15    | $6.00 \times 10^{-18}$ | $3.90 \times 10^{-15}$ |
| GO:0022402 | cell cycle process                               | 426       | 46          | 11.82    | $4.50 \times 10^{-16}$ | $2.40 \times 10^{-13}$ |
| GO:0006259 | DNA metabolic process                            | 359       | 41          | 9.96     | $3.40 \times 10^{-15}$ | $1.50 \times 10^{-12}$ |
| GO:0000278 | mitotic cell cycle                               | 298       | 35          | 8.27     | $2.00 \times 10^{-13}$ | $8.10 \times 10^{-11}$ |
| GO:0007059 | chromosome segregation                           | 84        | 19          | 2.33     | $8.10 \times 10^{-13}$ | $2.90 \times 10^{-10}$ |
| GO:0000819 | sister chromatid segregation                     | 37        | 12          | 1.03     | $1.50 \times 10^{-10}$ | $5.00 \times 10^{-8}$  |
| GO:1902589 | single-organism organelle organization           | 777       | 53          | 21.56    | $2.80 \times 10^{-10}$ | $8.20 \times 10^{-8}$  |
| GO:0000070 | mitotic sister chromatid segregation             | 32        | 11          | 0.89     | $4.50 \times 10^{-10}$ | $1.20 \times 10^{-7}$  |
| GO:0090304 | nucleic acid metabolic process                   | 1737      | 87          | 48.19    | $1.40 \times 10^{-9}$  | $3.60 \times 10^{-7}$  |
| GO:0000226 | microtubule cytoskeleton organization            | 159       | 21          | 4.41     | $2.20 \times 10^{-9}$  | $5.10 \times 10^{-7}$  |
| GO:0007017 | microtubule-based process                        | 233       | 25          | 6.46     | $5.00 \times 10^{-9}$  | $1.10 \times 10^{-6}$  |
| GO:0006260 | DNA replication                                  | 100       | 16          | 2.77     | $1.20 \times 10^{-8}$  | $2.40 \times 10^{-6}$  |
| GO:0006996 | organelle organization                           | 1167      | 64          | 32.38    | $2.10 \times 10^{-8}$  | $3.90 \times 10^{-6}$  |
| GO:0007051 | spindle organization                             | 35        | 10          | 0.97     | $2.20 \times 10^{-8}$  | $3.90 \times 10^{-6}$  |
| GO:0006807 | nitrogen compound metabolic process              | 2423      | 105         | 67.23    | $4.20 \times 10^{-8}$  | $7.00 \times 10^{-6}$  |
| GO:0006974 | cellular response to DNA damage stimulus         | 265       | 25          | 7.35     | $6.80 \times 10^{-8}$  | $1.10 \times 10^{-5}$  |
| GO:0006725 | cellular aromatic compound metabolic process     | 2231      | 98          | 61.9     | $9.30 \times 10^{-8}$  | $1.40 \times 10^{-5}$  |
| GO:1901360 | organic cyclic compound metabolic process        | 2299      | 100         | 63.79    | $1.00 \times 10^{-7}$  | $1.50 \times 10^{-5}$  |
| GO:0006281 | DNA repair                                       | 164       | 19          | 4.55     | $1.20 \times 10^{-7}$  | $1.60 \times 10^{-5}$  |
| GO:0051276 | chromosome organization                          | 353       | 29          | 9.79     | $1.20 \times 10^{-7}$  | $1.60 \times 10^{-5}$  |
| GO:0034641 | cellular nitrogen compound metabolic process     | 2300      | 99          | 63.82    | $2.20 \times 10^{-7}$  | $2.80 \times 10^{-5}$  |
| GO:0006139 | nucleobase-containing compound metabolic process | 2181      | 95          | 60.51    | $2.70 \times 10^{-7}$  | $3.40 \times 10^{-5}$  |
| GO:0046483 | heterocycle metabolic process                    | 2226      | 96          | 61.76    | $3.70 \times 10^{-7}$  | $4.40 \times 10^{-5}$  |
| GO:0051726 | regulation of cell cycle                         | 293       | 25          | 8.13     | $4.70 \times 10^{-7}$  | $5.50 \times 10^{-5}$  |
| GO:0034502 | protein localization to chromosome               | 13        | 6           | 0.36     | $6.20 \times 10^{-7}$  | $6.90 \times 10^{-5}$  |
| GO:0010564 | regulation of cell cycle process                 | 170       | 18          | 4.72     | $9.70 \times 10^{-7}$  | $1.00 \times 10^{-4}$  |
| GO:0007088 | regulation of mitosis                            | 42        | 9           | 1.17     | $1.70 \times 10^{-6}$  | 0.00017                |
| GO:0071103 | DNA conformation change                          | 81        | 12          | 2.25     | $2.00 \times 10^{-6}$  | $2.00 \times 10^{-4}$  |
| GO:0033554 | cellular response to stress                      | 519       | 33          | 14.4     | $5.40 \times 10^{-6}$  | 0.00053                |
| GO:0006261 | DNA-dependent DNA replication                    | 37        | 8           | 1.03     | $6.00 \times 10^{-6}$  | 0.00056                |
| GO:0030261 | chromosome condensation                          | 11        | 5           | 0.31     | $6.30 \times 10^{-6}$  | 0.00058                |
| GO:0043170 | macromolecule metabolic process                  | 3038      | 116         | 84.29    | $6.90 \times 10^{-6}$  | 0.00061                |
| GO:0006323 | DNA packaging                                    | 64        | 10          | 1.78     | $9.00 \times 10^{-6}$  | 0.00078                |
| GO:0051783 | regulation of nuclear division                   | 52        | 9           | 1.44     | $1.10 \times 10^{-5}$  | $9.00 \times 10^{-4}$  |
| GO:0071840 | cellular component organization or biogenesis    | 1968      | 83          | 54.6     | $1.10 \times 10^{-5}$  | $9.00 \times 10^{-4}$  |
| GO:0044260 | cellular macromolecule metabolic process         | 2729      | 106         | 75.72    | $1.30 \times 10^{-5}$  | 0.001                  |
| GO:0016043 | cellular component organization                  | 1917      | 81          | 53.19    | $1.40 \times 10^{-5}$  | 0.0011                 |
| GO:0007346 | regulation of mitotic cell cycle                 | 131       | 14          | 3.63     | $1.50 \times 10^{-5}$  | 0.0011                 |
| GO:0044770 | cell cycle phase transition                      | 131       | 14          | 3.63     | $1.50 \times 10^{-5}$  | 0.0011                 |
| GO:0006302 | double-strand break repair                       | 55        | 9           | 1.53     | $1.70 \times 10^{-5}$  | 0.0013                 |
| GO:0000075 | cell cycle checkpoint                            | 71        | 10          | 1.97     | $2.30 \times 10^{-5}$  | 0.0017                 |
| GO:0050000 | chromosome localization                          | 15        | 5           | 0.42     | $3.80 \times 10^{-5}$  | 0.0026                 |
| GO:0051303 | establishment of chromosome localization         | 15        | 5           | 0.42     | $3.80 \times 10^{-5}$  | 0.0026                 |
| GO:0044772 | mitotic cell cycle phase transition              | 129       | 13          | 3.58     | $5.50 \times 10^{-5}$  | 0.0037                 |
| GO:0071704 | organic substance metabolic process              | 3827      | 134         | 106.18   | $8.00 \times 10^{-5}$  | 0.0052                 |
| GO:0000910 | cytokinesis                                      | 52        | 8           | 1.44     | $8.10 \times 10^{-5}$  | 0.0052                 |
| GO:0044238 | primary metabolic process                        | 3693      | 130         | 102.47   | $9.60 \times 10^{-5}$  | 0.006                  |
| GO:0051302 | regulation of cell division                      | 84        | 10          | 2.33     | 0.0001                 | 0.0062                 |
| GO:0090068 | positive regulation of cell cycle process        | 69        | 9           | 1.91     | 0.00011                | 0.0067                 |
| GO:0044237 | cellular metabolic process                       | 3671      | 129         | 101.85   | 0.00012                | 0.0071                 |



|            |                                                            |      |     |        |         |       |
|------------|------------------------------------------------------------|------|-----|--------|---------|-------|
| GO:0007052 | mitotic spindle organization                               | 20   | 5   | 0.55   | 0.00017 | 0.01  |
| GO:0006310 | DNA recombination                                          | 74   | 9   | 2.05   | 0.00019 | 0.011 |
| GO:0007093 | mitotic cell cycle checkpoint                              | 45   | 7   | 1.25   | 0.00021 | 0.012 |
| GO:0009262 | deoxyribonucleotide metabolic process                      | 12   | 4   | 0.33   | 0.00024 | 0.013 |
| GO:0051310 | metaphase plate congression                                | 12   | 4   | 0.33   | 0.00024 | 0.013 |
| GO:0007091 | metaphase/anaphase transition of mitotic cell cycle        | 22   | 5   | 0.61   | 0.00028 | 0.015 |
| GO:0044784 | metaphase/anaphase transition of cell cycle                | 22   | 5   | 0.61   | 0.00028 | 0.015 |
| GO:0051297 | centrosome organization                                    | 34   | 6   | 0.94   | 0.0003  | 0.016 |
| GO:0007010 | cytoskeleton organization                                  | 404  | 24  | 11.21  | 0.00033 | 0.017 |
| GO:0071824 | protein-DNA complex subunit organization                   | 65   | 8   | 1.8    | 0.0004  | 0.02  |
| GO:0032886 | regulation of microtubule-based process                    | 66   | 8   | 1.83   | 0.00044 | 0.022 |
| GO:0031023 | microtubule organizing center organization                 | 37   | 6   | 1.03   | 0.00048 | 0.023 |
| GO:0008152 | metabolic process                                          | 4173 | 140 | 115.78 | 0.00048 | 0.023 |
| GO:0065004 | protein-DNA complex assembly                               | 52   | 7   | 1.44   | 0.00053 | 0.025 |
| GO:0051983 | regulation of chromosome segregation                       | 15   | 4   | 0.42   | 0.00062 | 0.029 |
| GO:0007126 | meiotic nuclear division                                   | 72   | 8   | 2      | 0.0008  | 0.037 |
| GO:0051225 | spindle assembly                                           | 16   | 4   | 0.44   | 0.00081 | 0.037 |
| GO:1901988 | negative regulation of cell cycle phase transition         | 56   | 7   | 1.55   | 0.00084 | 0.037 |
| GO:1901991 | negative regulation of mitotic cell cycle phase transition | 56   | 7   | 1.55   | 0.00084 | 0.037 |
| GO:0051321 | meiotic cell cycle                                         | 74   | 8   | 2.05   | 0.00096 | 0.042 |
| GO:0070507 | regulation of microtubule cytoskeleton organization        | 58   | 7   | 1.61   | 0.00104 | 0.045 |

Supplemental Table 4.  
Gene Ontology enrichment for proliferative cells.

| GO.ID      | Term                                                     | Annotated | Significant | Expected | Fisher                 | adjP                   |
|------------|----------------------------------------------------------|-----------|-------------|----------|------------------------|------------------------|
| GO:0002376 | immune system process                                    | 686       | 39          | 10.26    | $5.10 \times 10^{-14}$ | $1.60 \times 10^{-10}$ |
| GO:0006950 | response to stress                                       | 1037      | 47          | 15.51    | $2.60 \times 10^{-13}$ | $4.10 \times 10^{-10}$ |
| GO:0006955 | immune response                                          | 343       | 26          | 5.13     | $3.70 \times 10^{-12}$ | $4.00 \times 10^{-9}$  |
| GO:0006952 | defense response                                         | 360       | 26          | 5.39     | $1.10 \times 10^{-11}$ | $9.00 \times 10^{-9}$  |
| GO:0009607 | response to biotic stimulus                              | 222       | 20          | 3.32     | $7.30 \times 10^{-11}$ | $4.10 \times 10^{-8}$  |
| GO:0009611 | response to wounding                                     | 303       | 23          | 4.53     | $7.70 \times 10^{-11}$ | $4.10 \times 10^{-8}$  |
| GO:0043207 | response to external biotic stimulus                     | 209       | 19          | 3.13     | $2.00 \times 10^{-10}$ | $7.90 \times 10^{-8}$  |
| GO:0051707 | response to other organism                               | 209       | 19          | 3.13     | $2.00 \times 10^{-10}$ | $7.90 \times 10^{-8}$  |
| GO:0050896 | response to stimulus                                     | 2592      | 72          | 38.78    | $2.20 \times 10^{-10}$ | $8.00 \times 10^{-8}$  |
| GO:0001562 | response to protozoan                                    | 16        | 7           | 0.24     | $1.40 \times 10^{-9}$  | $4.60 \times 10^{-7}$  |
| GO:0006954 | inflammatory response                                    | 186       | 17          | 2.78     | $1.80 \times 10^{-9}$  | $5.30 \times 10^{-7}$  |
| GO:0098542 | defense response to other organism                       | 109       | 13          | 1.63     | $6.70 \times 10^{-9}$  | $1.80 \times 10^{-6}$  |
| GO:0051716 | cellular response to stimulus                            | 2086      | 60          | 31.21    | $1.00 \times 10^{-8}$  | $2.50 \times 10^{-6}$  |
| GO:0009605 | response to external stimulus                            | 563       | 27          | 8.42     | $3.90 \times 10^{-8}$  | $9.10 \times 10^{-6}$  |
| GO:0042832 | defense response to protozoan                            | 15        | 6           | 0.22     | $4.40 \times 10^{-8}$  | $9.50 \times 10^{-6}$  |
| GO:0002682 | regulation of immune system process                      | 356       | 20          | 5.33     | $2.50 \times 10^{-7}$  | $5.10 \times 10^{-5}$  |
| GO:0048584 | positive regulation of response to stimulus              | 553       | 25          | 8.27     | $4.30 \times 10^{-7}$  | $8.20 \times 10^{-5}$  |
| GO:0002684 | positive regulation of immune system process             | 211       | 15          | 3.16     | $4.90 \times 10^{-7}$  | $8.80 \times 10^{-5}$  |
| GO:0051704 | multi-organism process                                   | 534       | 24          | 7.99     | $8.60 \times 10^{-7}$  | 0.00015                |
| GO:0070887 | cellular response to chemical stimulus                   | 638       | 26          | 9.54     | $1.80 \times 10^{-6}$  | 0.00028                |
| GO:0034097 | response to cytokine                                     | 175       | 13          | 2.62     | $1.80 \times 10^{-6}$  | 0.00028                |
| GO:0045087 | innate immune response                                   | 151       | 12          | 2.26     | $2.30 \times 10^{-6}$  | 0.00034                |
| GO:0009617 | response to bacterium                                    | 133       | 11          | 1.99     | $4.30 \times 10^{-6}$  | $6.00 \times 10^{-4}$  |
| GO:0060341 | regulation of cellular localization                      | 359       | 18          | 5.37     | $5.50 \times 10^{-6}$  | 0.00074                |
| GO:0007165 | signal transduction                                      | 1676      | 46          | 25.07    | $7.40 \times 10^{-6}$  | 0.00093                |
| GO:0071345 | cellular response to cytokine stimulus                   | 141       | 11          | 2.11     | $7.50 \times 10^{-6}$  | 0.00093                |
| GO:0044763 | single-organism cellular process                         | 4283      | 87          | 64.07    | $8.50 \times 10^{-6}$  | 0.001                  |
| GO:0008283 | cell proliferation                                       | 613       | 24          | 9.17     | $9.70 \times 10^{-6}$  | 0.0011                 |
| GO:0010033 | response to organic substance                            | 701       | 26          | 10.49    | $1.00 \times 10^{-5}$  | 0.0011                 |
| GO:0042221 | response to chemical                                     | 983       | 32          | 14.71    | $1.20 \times 10^{-5}$  | 0.0013                 |
| GO:0048518 | positive regulation of biological process                | 1617      | 44          | 24.19    | $1.70 \times 10^{-5}$  | 0.0017                 |
| GO:0023056 | positive regulation of signaling                         | 433       | 19          | 6.48     | $2.00 \times 10^{-5}$  | 0.002                  |
| GO:0023052 | signaling                                                | 1851      | 48          | 27.69    | $2.10 \times 10^{-5}$  | 0.002                  |
| GO:0044700 | single organism signaling                                | 1851      | 48          | 27.69    | $2.10 \times 10^{-5}$  | 0.002                  |
| GO:0010647 | positive regulation of cell communication                | 436       | 19          | 6.52     | $2.20 \times 10^{-5}$  | 0.002                  |
| GO:0006913 | nucleocytoplasmic transport                              | 158       | 11          | 2.36     | $2.20 \times 10^{-5}$  | 0.002                  |
| GO:0051169 | nuclear transport                                        | 159       | 11          | 2.38     | $2.40 \times 10^{-5}$  | 0.002                  |
| GO:0006606 | protein import into nucleus                              | 106       | 9           | 1.59     | $2.70 \times 10^{-5}$  | 0.0022                 |
| GO:0044744 | protein targeting to nucleus                             | 106       | 9           | 1.59     | $2.70 \times 10^{-5}$  | 0.0022                 |
| GO:1902593 | single-organism nuclear import                           | 106       | 9           | 1.59     | $2.70 \times 10^{-5}$  | 0.0022                 |
| GO:0032880 | regulation of protein localization                       | 226       | 13          | 3.38     | $3.00 \times 10^{-5}$  | 0.0023                 |
| GO:0009967 | positive regulation of signal transduction               | 407       | 18          | 6.09     | $3.00 \times 10^{-5}$  | 0.0023                 |
| GO:0007154 | cell communication                                       | 1878      | 48          | 28.09    | $3.10 \times 10^{-5}$  | 0.0023                 |
| GO:0051170 | nuclear import                                           | 108       | 9           | 1.62     | $3.10 \times 10^{-5}$  | 0.0023                 |
| GO:0048583 | regulation of response to stimulus                       | 1135      | 34          | 16.98    | $3.40 \times 10^{-5}$  | 0.0024                 |
| GO:0032386 | regulation of intracellular transport                    | 166       | 11          | 2.48     | $3.50 \times 10^{-5}$  | 0.0024                 |
| GO:0001816 | cytokine production                                      | 197       | 12          | 2.95     | $3.50 \times 10^{-5}$  | 0.0024                 |
| GO:0048522 | positive regulation of cellular process                  | 1448      | 40          | 21.66    | $3.50 \times 10^{-5}$  | 0.0024                 |
| GO:0032879 | regulation of localization                               | 756       | 26          | 11.31    | $3.80 \times 10^{-5}$  | 0.0025                 |
| GO:0042742 | defense response to bacterium                            | 43        | 6           | 0.64     | $3.80 \times 10^{-5}$  | 0.0025                 |
| GO:0001775 | cell activation                                          | 303       | 15          | 4.53     | $4.20 \times 10^{-5}$  | 0.0026                 |
| GO:0046822 | regulation of nucleocytoplasmic transport                | 87        | 8           | 1.3      | $4.30 \times 10^{-5}$  | 0.0027                 |
| GO:1902533 | positive regulation of intracellular signal transduction | 272       | 14          | 4.07     | $5.00 \times 10^{-5}$  | 0.003                  |
| GO:0017038 | protein import                                           | 116       | 9           | 1.74     | $5.50 \times 10^{-5}$  | 0.0033                 |

|            |                                                         |      |    |       |                       |        |
|------------|---------------------------------------------------------|------|----|-------|-----------------------|--------|
| GO:0033365 | protein localization to organelle                       | 207  | 12 | 3.1   | $5.70 \times 10^{-5}$ | 0.0033 |
| GO:0051223 | regulation of protein transport                         | 176  | 11 | 2.63  | $6.00 \times 10^{-5}$ | 0.0033 |
| GO:0008219 | cell death                                              | 731  | 25 | 10.94 | $6.10 \times 10^{-5}$ | 0.0033 |
| GO:0002221 | pattern recognition receptor signaling pathway          | 29   | 5  | 0.43  | $6.10 \times 10^{-5}$ | 0.0033 |
| GO:0002758 | innate immune response-activating signal transduction   | 29   | 5  | 0.43  | $6.10 \times 10^{-5}$ | 0.0033 |
| GO:0016265 | death                                                   | 732  | 25 | 10.95 | $6.20 \times 10^{-5}$ | 0.0034 |
| GO:0051641 | cellular localization                                   | 927  | 29 | 13.87 | $7.10 \times 10^{-5}$ | 0.0038 |
| GO:0010562 | positive regulation of phosphorus metabolic process     | 320  | 15 | 4.79  | $7.80 \times 10^{-5}$ | 0.004  |
| GO:0045937 | positive regulation of phosphate metabolic process      | 320  | 15 | 4.79  | $7.80 \times 10^{-5}$ | 0.004  |
| GO:0002218 | activation of innate immune response                    | 31   | 5  | 0.46  | $8.60 \times 10^{-5}$ | 0.0043 |
| GO:0050776 | regulation of immune response                           | 186  | 11 | 2.78  | $9.90 \times 10^{-5}$ | 0.0048 |
| GO:0042307 | positive regulation of protein import into nucleus      | 32   | 5  | 0.48  | 0.0001                | 0.0048 |
| GO:0042306 | regulation of protein import into nucleus               | 73   | 7  | 1.09  | 0.0001                | 0.0048 |
| GO:0051222 | positive regulation of protein transport                | 98   | 8  | 1.47  | 0.0001                | 0.0048 |
| GO:0070201 | regulation of establishment of protein localization     | 190  | 11 | 2.84  | 0.00012               | 0.0056 |
| GO:0071310 | cellular response to organic substance                  | 498  | 19 | 7.45  | 0.00013               | 0.006  |
| GO:0034504 | protein localization to nucleus                         | 130  | 9  | 1.94  | 0.00013               | 0.006  |
| GO:0033157 | regulation of intracellular protein transport           | 102  | 8  | 1.53  | 0.00013               | 0.006  |
| GO:0042127 | regulation of cell proliferation                        | 500  | 19 | 7.48  | 0.00014               | 0.0062 |
| GO:0051050 | positive regulation of transport                        | 263  | 13 | 3.93  | 0.00014               | 0.0062 |
| GO:0006915 | apoptotic process                                       | 680  | 23 | 10.17 | 0.00015               | 0.0065 |
| GO:1900180 | regulation of protein localization to nucleus           | 78   | 7  | 1.17  | 0.00015               | 0.0065 |
| GO:0051649 | establishment of localization in cell                   | 778  | 25 | 11.64 | 0.00017               | 0.007  |
| GO:0090316 | positive regulation of intracellular protein transport  | 56   | 6  | 0.84  | 0.00017               | 0.0072 |
| GO:0002757 | immune response-activating signal transduction          | 80   | 7  | 1.2   | 0.00018               | 0.0074 |
| GO:0035556 | intracellular signal transduction                       | 882  | 27 | 13.19 | 0.00019               | 0.0078 |
| GO:0032388 | positive regulation of intracellular transport          | 81   | 7  | 1.21  | 0.0002                | 0.0078 |
| GO:0012501 | programmed cell death                                   | 694  | 23 | 10.38 | 0.0002                | 0.008  |
| GO:0045321 | leukocyte activation                                    | 275  | 13 | 4.11  | 0.00022               | 0.0085 |
| GO:0072594 | establishment of protein localization to organelle      | 139  | 9  | 2.08  | 0.00022               | 0.0085 |
| GO:0050900 | leukocyte migration                                     | 83   | 7  | 1.24  | 0.00023               | 0.0086 |
| GO:0044699 | single-organism process                                 | 4800 | 90 | 71.81 | 0.00024               | 0.0088 |
| GO:0001817 | regulation of cytokine production                       | 172  | 10 | 2.57  | 0.00024               | 0.0088 |
| GO:0001934 | positive regulation of protein phosphorylation          | 241  | 12 | 3.61  | 0.00024               | 0.0089 |
| GO:0042981 | regulation of apoptotic process                         | 523  | 19 | 7.82  | 0.00025               | 0.009  |
| GO:0002252 | immune effector process                                 | 207  | 11 | 3.1   | 0.00025               | 0.009  |
| GO:0030595 | leukocyte chemotaxis                                    | 60   | 6  | 0.9   | 0.00026               | 0.009  |
| GO:0046824 | positive regulation of nucleocytoplasmic transport      | 39   | 5  | 0.58  | 0.00026               | 0.0092 |
| GO:0042327 | positive regulation of phosphorylation                  | 281  | 13 | 4.2   | 0.00027               | 0.0095 |
| GO:0006796 | phosphate-containing compound metabolic process         | 1366 | 36 | 20.43 | 0.00028               | 0.0095 |
| GO:0002764 | immune response-regulating signaling pathway            | 86   | 7  | 1.29  | 0.00028               | 0.0096 |
| GO:0043067 | regulation of programmed cell death                     | 530  | 19 | 7.93  | 0.0003                | 0.01   |
| GO:0042060 | wound healing                                           | 117  | 8  | 1.75  | 0.00035               | 0.012  |
| GO:0034613 | cellular protein localization                           | 451  | 17 | 6.75  | 0.00036               | 0.012  |
| GO:0006793 | phosphorus metabolic process                            | 1384 | 36 | 20.7  | 0.00036               | 0.012  |
| GO:0006110 | regulation of glycolysis                                | 10   | 3  | 0.15  | 0.00036               | 0.012  |
| GO:0048247 | lymphocyte chemotaxis                                   | 10   | 3  | 0.15  | 0.00036               | 0.012  |
| GO:0002274 | myeloid leukocyte activation                            | 64   | 6  | 0.96  | 0.00036               | 0.012  |
| GO:0070727 | cellular macromolecule localization                     | 453  | 17 | 6.78  | 0.00038               | 0.012  |
| GO:0002253 | activation of immune response                           | 91   | 7  | 1.36  | 0.0004                | 0.012  |
| GO:0034341 | response to interferon-gamma                            | 25   | 4  | 0.37  | 0.00047               | 0.014  |
| GO:0009987 | cellular process                                        | 5407 | 97 | 80.89 | 0.00048               | 0.015  |
| GO:0002237 | response to molecule of bacterial origin                | 94   | 7  | 1.41  | 0.00049               | 0.015  |
| GO:0019221 | cytokine-mediated signaling pathway                     | 94   | 7  | 1.41  | 0.00049               | 0.015  |
| GO:0048009 | insulin-like growth factor receptor signaling pathway   | 11   | 3  | 0.16  | 0.00049               | 0.015  |
| GO:0051240 | positive regulation of multicellular organismal process | 225  | 11 | 3.37  | 0.00052               | 0.015  |
| GO:0010941 | regulation of cell death                                | 558  | 19 | 8.35  | 0.00057               | 0.016  |
| GO:0051049 | regulation of transport                                 | 561  | 19 | 8.39  | 0.00061               | 0.017  |

|            |                                                                      |      |    |       |         |       |
|------------|----------------------------------------------------------------------|------|----|-------|---------|-------|
| GO:0045089 | positive regulation of innate immune response                        | 47   | 5  | 0.7   | 0.00064 | 0.018 |
| GO:0009893 | positive regulation of metabolic process                             | 899  | 26 | 13.45 | 0.00064 | 0.018 |
| GO:0055080 | cation homeostasis                                                   | 195  | 10 | 2.92  | 0.00065 | 0.018 |
| GO:0046885 | regulation of hormone biosynthetic process                           | 12   | 3  | 0.18  | 0.00065 | 0.018 |
| GO:0097529 | myeloid leukocyte migration                                          | 49   | 5  | 0.73  | 0.00078 | 0.021 |
| GO:0050778 | positive regulation of immune response                               | 132  | 8  | 1.97  | 0.00078 | 0.021 |
| GO:0002694 | regulation of leukocyte activation                                   | 165  | 9  | 2.47  | 0.00078 | 0.021 |
| GO:0032350 | regulation of hormone metabolic process                              | 13   | 3  | 0.19  | 0.00084 | 0.022 |
| GO:0034502 | protein localization to chromosome                                   | 13   | 3  | 0.19  | 0.00084 | 0.022 |
| GO:0006886 | intracellular protein transport                                      | 278  | 12 | 4.16  | 0.00088 | 0.023 |
| GO:0030335 | positive regulation of cell migration                                | 135  | 8  | 2.02  | 0.0009  | 0.024 |
| GO:0048285 | organelle fission                                                    | 241  | 11 | 3.61  | 0.00092 | 0.024 |
| GO:0065008 | regulation of biological quality                                     | 1076 | 29 | 16.1  | 0.00093 | 0.024 |
| GO:0006809 | nitric oxide biosynthetic process                                    | 30   | 4  | 0.45  | 0.00097 | 0.024 |
| GO:0010564 | regulation of cell cycle process                                     | 170  | 9  | 2.54  | 0.00097 | 0.024 |
| GO:0031349 | positive regulation of defense response                              | 77   | 6  | 1.15  | 0.00098 | 0.024 |
| GO:0051249 | regulation of lymphocyte activation                                  | 137  | 8  | 2.05  | 0.00099 | 0.024 |
| GO:0006605 | protein targeting                                                    | 171  | 9  | 2.56  | 0.00101 | 0.024 |
| GO:0006935 | chemotaxis                                                           | 171  | 9  | 2.56  | 0.00101 | 0.024 |
| GO:0007067 | mitosis                                                              | 171  | 9  | 2.56  | 0.00101 | 0.024 |
| GO:0042330 | taxis                                                                | 171  | 9  | 2.56  | 0.00101 | 0.024 |
| GO:0050865 | regulation of cell activation                                        | 171  | 9  | 2.56  | 0.00101 | 0.024 |
| GO:0050663 | cytokine secretion                                                   | 52   | 5  | 0.78  | 0.00102 | 0.024 |
| GO:2000147 | positive regulation of cell motility                                 | 138  | 8  | 2.06  | 0.00104 | 0.024 |
| GO:0050789 | regulation of biological process                                     | 3545 | 70 | 53.03 | 0.00105 | 0.024 |
| GO:0043470 | regulation of carbohydrate catabolic process                         | 14   | 3  | 0.21  | 0.00105 | 0.024 |
| GO:0043471 | regulation of cellular carbohydrate catabolic process                | 14   | 3  | 0.21  | 0.00105 | 0.024 |
| GO:0050850 | positive regulation of calcium-mediated signaling                    | 14   | 3  | 0.21  | 0.00105 | 0.024 |
| GO:0072676 | lymphocyte migration                                                 | 14   | 3  | 0.21  | 0.00105 | 0.024 |
| GO:0007166 | cell surface receptor signaling pathway                              | 936  | 26 | 14    | 0.00117 | 0.027 |
| GO:0040017 | positive regulation of locomotion                                    | 141  | 8  | 2.11  | 0.00119 | 0.027 |
| GO:0051272 | positive regulation of cellular component movement                   | 141  | 8  | 2.11  | 0.00119 | 0.027 |
| GO:0050730 | regulation of peptidyl-tyrosine phosphorylation                      | 80   | 6  | 1.2   | 0.0012  | 0.027 |
| GO:0031325 | positive regulation of cellular metabolic process                    | 837  | 24 | 12.52 | 0.00122 | 0.027 |
| GO:0008284 | positive regulation of cell proliferation                            | 289  | 12 | 4.32  | 0.00123 | 0.027 |
| GO:0016482 | cytoplasmic transport                                                | 289  | 12 | 4.32  | 0.00123 | 0.027 |
| GO:0000070 | mitotic sister chromatid segregation                                 | 32   | 4  | 0.48  | 0.00124 | 0.027 |
| GO:0046209 | nitric oxide metabolic process                                       | 32   | 4  | 0.48  | 0.00124 | 0.027 |
| GO:0042246 | tissue regeneration                                                  | 15   | 3  | 0.22  | 0.0013  | 0.028 |
| GO:0045840 | positive regulation of mitosis                                       | 15   | 3  | 0.22  | 0.0013  | 0.028 |
| GO:0051247 | positive regulation of protein metabolic process                     | 374  | 14 | 5.59  | 0.00132 | 0.028 |
| GO:0031401 | positive regulation of protein modification process                  | 292  | 12 | 4.37  | 0.00135 | 0.028 |
| GO:0040011 | locomotion                                                           | 508  | 17 | 7.6   | 0.00138 | 0.029 |
| GO:0032270 | positive regulation of cellular protein metabolic process            | 334  | 13 | 5     | 0.00139 | 0.029 |
| GO:0051101 | regulation of DNA binding                                            | 33   | 4  | 0.49  | 0.00139 | 0.029 |
| GO:0050731 | positive regulation of peptidyl-tyrosine phosphorylation             | 56   | 5  | 0.84  | 0.00143 | 0.029 |
| GO:0006979 | response to oxidative stress                                         | 113  | 7  | 1.69  | 0.00146 | 0.03  |
| GO:0050801 | ion homeostasis                                                      | 218  | 10 | 3.26  | 0.00152 | 0.031 |
| GO:0051302 | regulation of cell division                                          | 84   | 6  | 1.26  | 0.00155 | 0.031 |
| GO:0065007 | biological regulation                                                | 3723 | 72 | 55.7  | 0.00158 | 0.031 |
| GO:0042116 | macrophage activation                                                | 16   | 3  | 0.24  | 0.00159 | 0.031 |
| GO:0070373 | negative regulation of $\times 10$ [RK1 and $\times 10$ [RK2 cascade | 16   | 3  | 0.24  | 0.00159 | 0.031 |
| GO:0048878 | chemical homeostasis                                                 | 299  | 12 | 4.47  | 0.00165 | 0.032 |
| GO:0045787 | positive regulation of cell cycle                                    | 58   | 5  | 0.87  | 0.00167 | 0.032 |
| GO:1902582 | single-organism intracellular transport                              | 428  | 15 | 6.4   | 0.00171 | 0.033 |
| GO:0071621 | granulocyte chemotaxis                                               | 35   | 4  | 0.52  | 0.00174 | 0.033 |
| GO:0008104 | protein localization                                                 | 764  | 22 | 11.43 | 0.0019  | 0.036 |
| GO:0045860 | positive regulation of protein kinase activity                       | 152  | 8  | 2.27  | 0.00193 | 0.036 |

|            |                                                                         |      |    |       |         |       |
|------------|-------------------------------------------------------------------------|------|----|-------|---------|-------|
| GO:0097530 | granulocyte migration                                                   | 36   | 4  | 0.54  | 0.00194 | 0.036 |
| GO:0018108 | peptidyl-tyrosine phosphorylation                                       | 119  | 7  | 1.78  | 0.00197 | 0.037 |
| GO:0000280 | nuclear division                                                        | 227  | 10 | 3.4   | 0.00206 | 0.038 |
| GO:0046907 | intracellular transport                                                 | 528  | 17 | 7.9   | 0.00208 | 0.038 |
| GO:0031347 | regulation of defense response                                          | 154  | 8  | 2.3   | 0.0021  | 0.038 |
| GO:0070372 | regulation of $\alpha$ 10[ $\beta$ 1 and $\alpha$ 10[ $\beta$ 2 cascade | 61   | 5  | 0.91  | 0.0021  | 0.038 |
| GO:0071216 | cellular response to biotic stimulus                                    | 61   | 5  | 0.91  | 0.0021  | 0.038 |
| GO:0000819 | sister chromatid segregation                                            | 37   | 4  | 0.55  | 0.00215 | 0.039 |
| GO:0023051 | regulation of signaling                                                 | 1029 | 27 | 15.39 | 0.00216 | 0.039 |
| GO:0018212 | peptidyl-tyrosine modification                                          | 121  | 7  | 1.81  | 0.00217 | 0.039 |
| GO:0060326 | cell chemotaxis                                                         | 90   | 6  | 1.35  | 0.00221 | 0.039 |
| GO:0010646 | regulation of cell communication                                        | 1031 | 27 | 15.42 | 0.00223 | 0.039 |
| GO:0045088 | regulation of innate immune response                                    | 62   | 5  | 0.93  | 0.00226 | 0.039 |
| GO:0042446 | hormone biosynthetic process                                            | 18   | 3  | 0.27  | 0.00226 | 0.039 |
| GO:0046649 | lymphocyte activation                                                   | 230  | 10 | 3.44  | 0.00226 | 0.039 |
| GO:0051301 | cell division                                                           | 311  | 12 | 4.65  | 0.00229 | 0.04  |
| GO:0032147 | activation of protein kinase activity                                   | 91   | 6  | 1.36  | 0.00234 | 0.04  |
| GO:0051251 | positive regulation of lymphocyte activation                            | 91   | 6  | 1.36  | 0.00234 | 0.04  |
| GO:0045944 | positive regulation of transcription from RNA polymerase II promoter    | 312  | 12 | 4.67  | 0.00235 | 0.04  |
| GO:0007049 | cell cycle                                                              | 582  | 18 | 8.71  | 0.00239 | 0.04  |
| GO:2001237 | negative regulation of extrinsic apoptotic signaling pathway            | 39   | 4  | 0.58  | 0.00261 | 0.044 |
| GO:0044275 | cellular carbohydrate catabolic process                                 | 19   | 3  | 0.28  | 0.00265 | 0.044 |
| GO:0045429 | positive regulation of nitric oxide biosynthetic process                | 19   | 3  | 0.28  | 0.00265 | 0.044 |
| GO:0051785 | positive regulation of nuclear division                                 | 19   | 3  | 0.28  | 0.00265 | 0.044 |
| GO:0042110 | T cell activation                                                       | 160  | 8  | 2.39  | 0.00266 | 0.044 |
| GO:0002685 | regulation of leukocyte migration                                       | 40   | 4  | 0.6   | 0.00287 | 0.047 |
| GO:0072507 | divalent inorganic cation homeostasis                                   | 128  | 7  | 1.91  | 0.00298 | 0.049 |
| GO:0051098 | regulation of binding                                                   | 96   | 6  | 1.44  | 0.00306 | 0.05  |
| GO:0032101 | regulation of response to external stimulus                             | 201  | 9  | 3.01  | 0.00308 | 0.05  |
| GO:0033674 | positive regulation of kinase activity                                  | 164  | 8  | 2.45  | 0.0031  | 0.05  |
